# Supplementary material
Source: Copernicus journal article supplement (doi:10.5194/egusphere-2026-2111)
Supplement: Supplementary file 1 [file egusphere-2026-2111-supplement.pdf]

# 1 Supplementary Documents

## S1 Supplementary Tables

**Table S1. Calibrated values of reduction rate ( $r_{RED}$ ), half saturation constants ( $K_{RED}$ ,  $K_{DOC}$ ), coefficient ( $q_{maxFe}$ ), and initial concentrations of  $Fe^{II}$ ,  $Fe^{III}$ ,  $Fe^{Tot}$  and DOC at 23, 27, and 33 °C for all four models. Uncertainties are provided in parentheses.**

| T (°C)                                                                        | $r_{RED}$<br>(mmol kg <sup>-1</sup> d <sup>-1</sup> ) | $K_{RED}$<br>(mmol kg <sup>-1</sup> ) | $K_{DOC}$<br>(mmol kg <sup>-1</sup> ) | $q_{maxFe}$<br>(-) | $Fe_0^{II}$<br>(mmol kg <sup>-1</sup> ) | $Fe_0^{III}$<br>(mmol kg <sup>-1</sup> ) | $Fe_0^{Tot}$<br>(mmol kg <sup>-1</sup> ) | $DOC_0$<br>(mmol kg <sup>-1</sup> ) |
|-------------------------------------------------------------------------------|-------------------------------------------------------|---------------------------------------|---------------------------------------|--------------------|-----------------------------------------|------------------------------------------|------------------------------------------|-------------------------------------|
| <b>One pool <math>Fe^{II}</math> model</b>                                    |                                                       |                                       |                                       |                    |                                         |                                          |                                          |                                     |
| 23                                                                            | 6.40 (0.15)                                           | 8.03 (0.99)                           | -                                     | -                  | 8.06 (0.44)                             | -                                        | 334.58 (31.96)                           | -                                   |
| 27                                                                            | 7.22 (0.43)                                           | 8.03 (1.01)                           | -                                     | -                  | 8.15 (0.44)                             | -                                        | 336.27 (32.01)                           | -                                   |
| 33                                                                            | 9.61 (0.27)                                           | 8.00 (0.99)                           | -                                     | -                  | 8.02 (0.44)                             | -                                        | 337.93 (31.80)                           | -                                   |
| <b>One pool <math>Fe^{III}</math> model</b>                                   |                                                       |                                       |                                       |                    |                                         |                                          |                                          |                                     |
| 23                                                                            | 9.19 (0.36)                                           | 9.45 (1.12)                           | -                                     | -                  | -                                       | 75.53 (0.45)                             | -                                        | -                                   |
| 27                                                                            | 10.13 (0.35)                                          | 8.50 (1.08)                           | -                                     | -                  | -                                       | 75.63 (0.45)                             | -                                        | -                                   |
| 33                                                                            | 15.97 (0.66)                                          | 15.28 (2.31)                          | -                                     | -                  | -                                       | 75.32 (0.45)                             | -                                        | -                                   |
| <b>Two pool model (<math>Fe^{II}</math> and <math>Fe^{III}</math>)</b>        |                                                       |                                       |                                       |                    |                                         |                                          |                                          |                                     |
| 23                                                                            | 7.96 (0.20)                                           | 7.36 (0.81)                           | -                                     | -                  | 7.22 (0.40)                             | 74.84 (0.43)                             | -                                        | -                                   |
| 27                                                                            | 9.88 (0.32)                                           | 8.34 (1.07)                           | -                                     | -                  | 8.04 (0.44)                             | 75.51 (0.44)                             | -                                        | -                                   |
| 33                                                                            | 15.95 (0.64)                                          | 15.74 (2.26)                          | -                                     | -                  | 8.09 (0.43)                             | 75.20 (0.44)                             | -                                        | -                                   |
| <b>Three pool model (<math>Fe^{II}</math>, <math>Fe^{III}</math> and DOC)</b> |                                                       |                                       |                                       |                    |                                         |                                          |                                          |                                     |
| 23                                                                            | 9.09 (0.33)                                           | 6.38 (0.72)                           | 3.77 (0.95)                           | 0.37 (0.03)        | 6.96 (0.40)                             | 74.43 (0.43)                             | -                                        | 48.10 (2.67)                        |
| 27                                                                            | 12.70 (0.81)                                          | 7.40 (0.90)                           | 5.49 (1.40)                           | 0.37 (0.03)        | 8.00 (0.44)                             | 75.28 (0.45)                             | -                                        | 45.29 (2.43)                        |
| 33                                                                            | 19.15 (1.22)                                          | 7.86 (0.96)                           | 8.10 (1.90)                           | 0.37 (0.03)        | 8.14 (0.43)                             | 75.29 (0.43)                             | -                                        | 44.38 (2.35)                        |

**Table S2. Log-normal prior distribution values for one, two, and three pool model. Values are shown as mean (standard deviation).**

| Parameter    | One pool ( $Fe^{II}$ ) | One pool ( $Fe^{III}$ ) | Two pool  | Three pool | Parameter description                 |
|--------------|------------------------|-------------------------|-----------|------------|---------------------------------------|
| $r_{RED}$    | 10 (2)                 | 10 (2)                  | 10 (2)    | 10 (2)     | Maximum rate of reduction             |
| $K_{RED}$    | 8 (1)                  | 8 (1)                   | 8 (1)     | 8 (1)      | Half-saturation constant of reduction |
| $K_{DOC}$    | -                      | -                       | -         | 10 (3)     | Half-saturation constant of DOC       |
| $q_{maxFe}$  | -                      | -                       | -         | 0.8 (0.1)  | DOC influence coefficient             |
| $Fe_0^{II}$  | 8.23 (1)               | -                       | 8.23 (1)  | 8.23 (1)   | Initial $Fe^{II}$ concentration       |
| $Fe_0^{III}$ | -                      | 75.67 (1)               | 75.67 (1) | 75.67 (1)  | Initial $Fe^{III}$ concentration      |
| $DOC_0$      | -                      | -                       | -         | 22 (2)     | Initial DOC concentration             |
| $Fe_0^{Tot}$ | 336 (32)               | -                       | -         | -          | Initial SRO-Fe concentration          |

**Table S3. Comparison of  $Q_{10}$  and Arrhenius model fits for different model configurations**

| Model                      | Parameter | $Q_{10}$ | $R^2$ | $E_a$ (kJ mol <sup>-1</sup> ) | $R^2$ |
|----------------------------|-----------|----------|-------|-------------------------------|-------|
| One pool Fe <sup>II</sup>  | $r_{RED}$ | 1.50     | 0.985 | 30.65                         | 0.983 |
|                            | $K_{RED}$ | 1.00     | 0.842 | 0                             | 0.835 |
| One pool Fe <sup>III</sup> | $r_{RED}$ | 1.77     | 0.952 | 43.03                         | 0.948 |
|                            | $K_{RED}$ | 1.58     | 0.705 | 33.93                         | 0.691 |
| Two pool                   | $r_{RED}$ | 1.97     | 0.989 | 51.04                         | 0.986 |
|                            | $K_{RED}$ | 2.11     | 0.941 | 55.90                         | 0.936 |
| Three pool                 | $r_{RED}$ | 2.12     | 0.996 | 56.52                         | 0.998 |
|                            | $K_{RED}$ | 1.23     | 0.881 | 15.46                         | 0.887 |

**Table S4. Model evaluation metrics (WAIC, LPML, LOO, and  $R^2$ ) for the four model structures across temperatures (23, 27, and 33 °C).**

| Model                      | Temp (°C) | WAIC   | LPML    | LOO    | $R^2$ |
|----------------------------|-----------|--------|---------|--------|-------|
| One pool Fe <sup>II</sup>  | 23        | 43.03  | -22.91  | 45.82  | 0.97  |
|                            | 27        | 36.44  | -18.39  | 36.79  | 0.91  |
|                            | 33        | 60.80  | -32.23  | 64.46  | 0.97  |
| One pool Fe <sup>III</sup> | 23        | 43.07  | -22.06  | 44.12  | 0.95  |
|                            | 27        | 44.95  | -23.34  | 46.67  | 0.95  |
|                            | 33        | 247.78 | -107.45 | 214.90 | 0.93  |
| Two pool                   | 23        | 129.51 | -67.68  | 106.76 | 0.93  |
|                            | 27        | 87.36  | -45.09  | 79.33  | 0.94  |
|                            | 33        | 484.56 | -230.28 | 354.07 | 0.75  |
| Three pool                 | 23        | 161.51 | -88.77  | 116.60 | 0.92  |
|                            | 27        | 85.40  | -44.71  | 71.97  | 0.93  |
|                            | 33        | 300.09 | -151.76 | 270.59 | 0.72  |

Corner plot for One pool ( $\text{Fe}^{\text{II}}$ ) model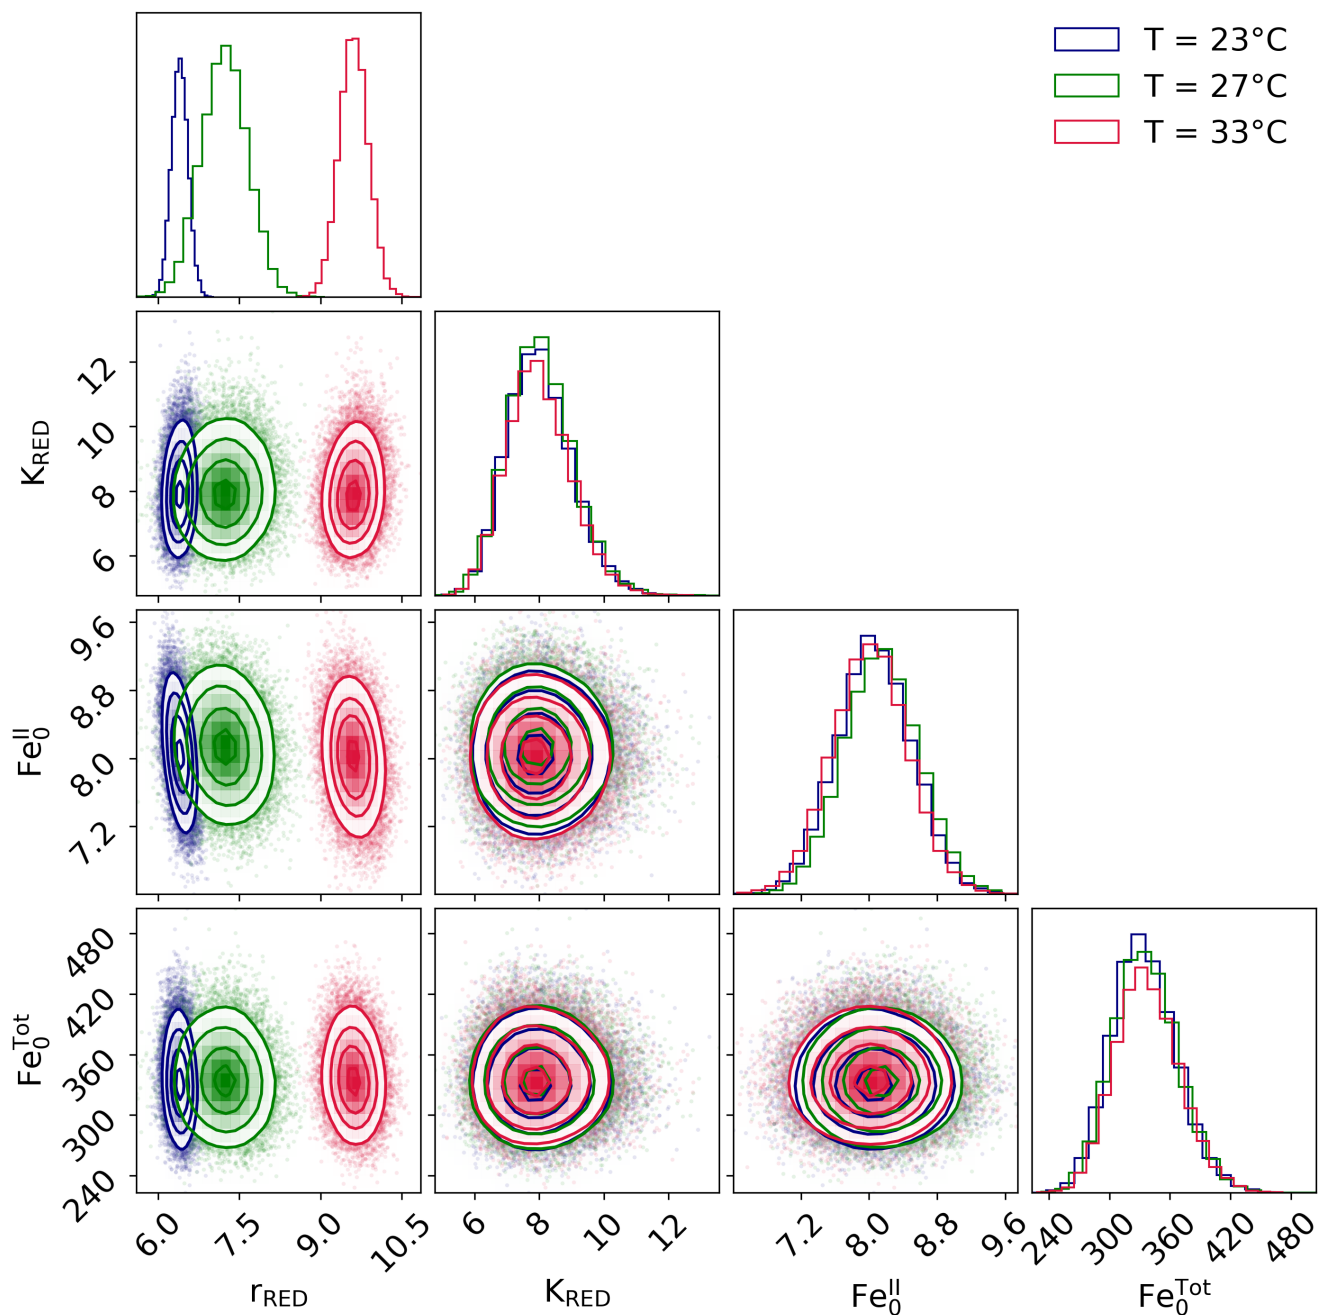Figure S1. Correlations in the posterior samples after MCMC for the one pool  $\text{Fe}^{\text{II}}$  model at 23, 27, and  $33^\circ\text{C}$ .

# Corner plot for One pool Fe<sup>III</sup> model

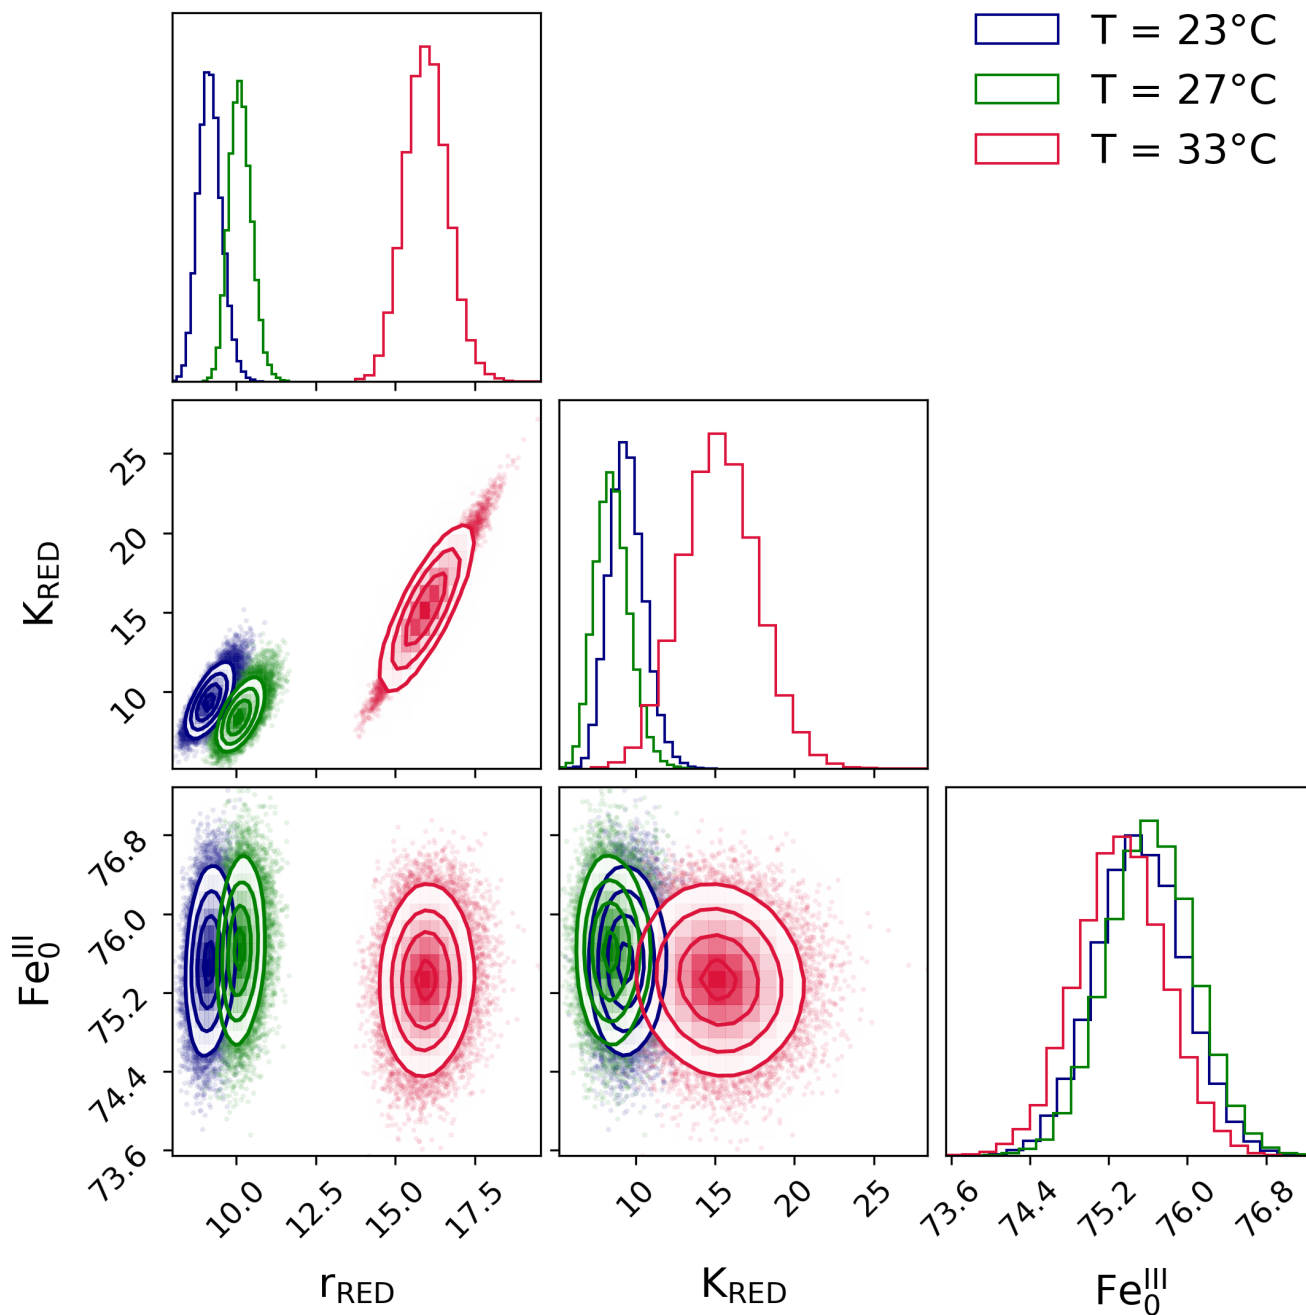

Figure S2. Correlations in the posterior samples after MCMC for the one pool Fe<sup>III</sup> model at 23, 27, and 33 °C.

# Corner plot for Two pool model

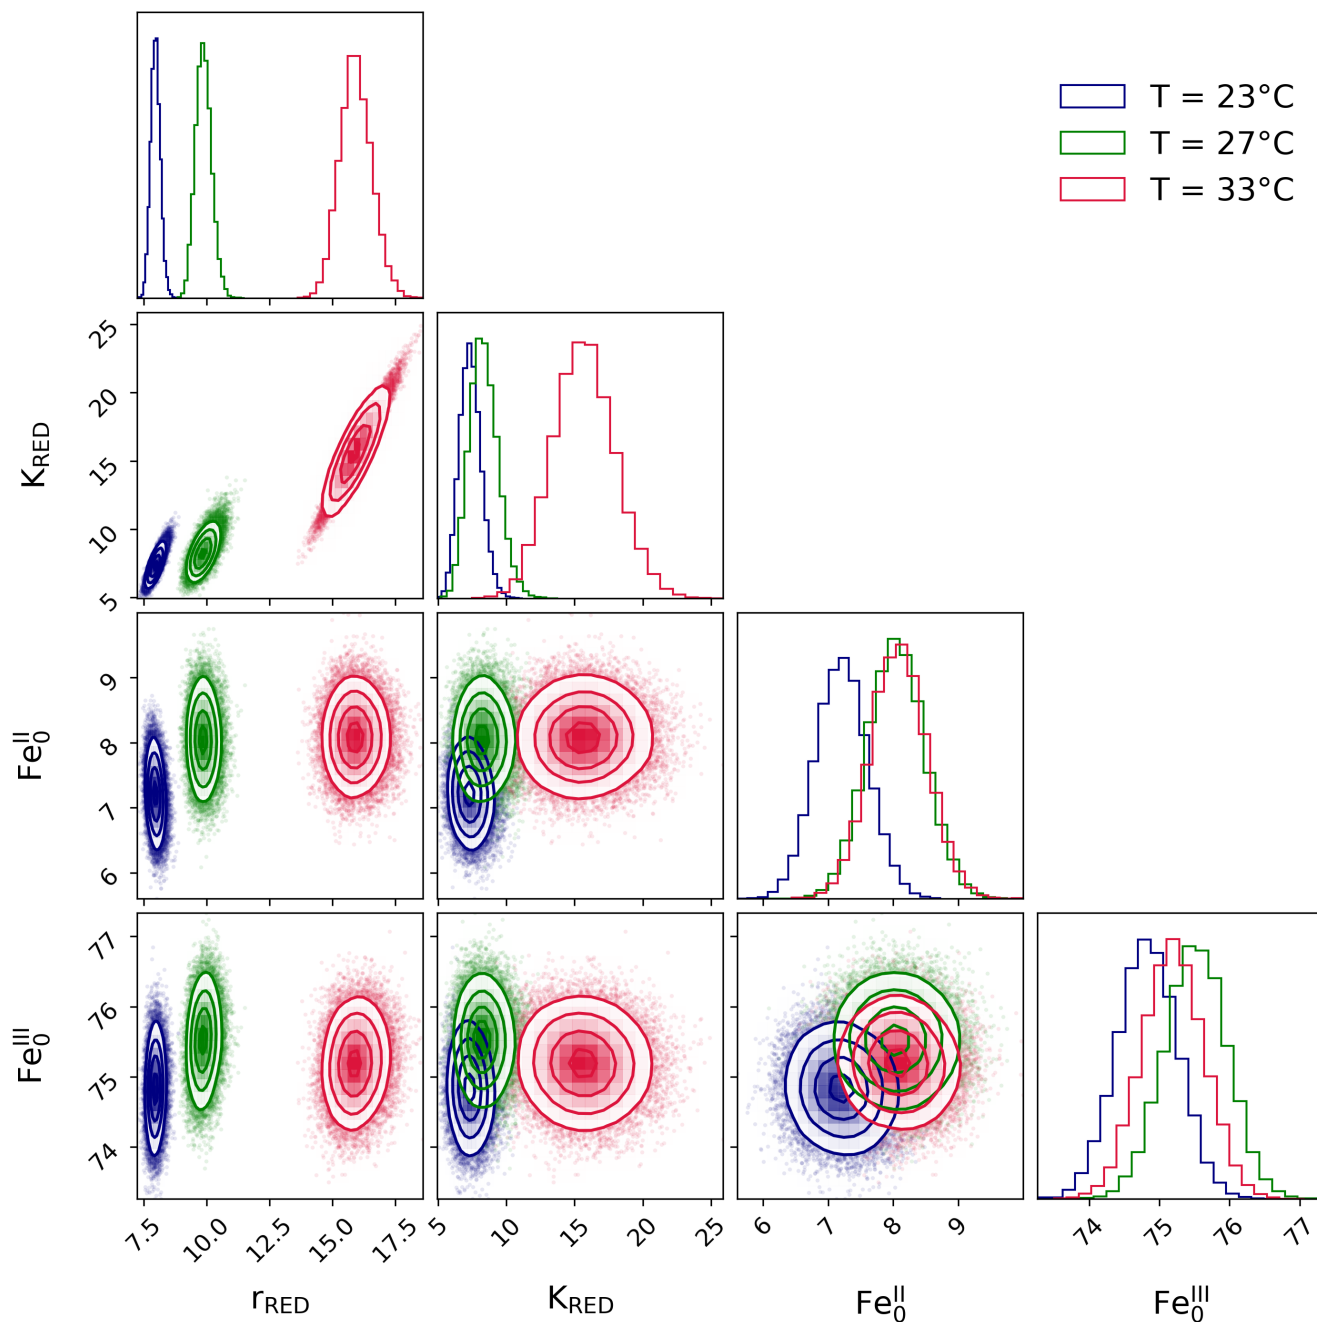

Figure S3. Posterior distributions of parameters ( $\Gamma_{\text{RED}}$ ,  $K_{\text{RED}}$ ) and initial values of  $\text{Fe}^{\text{II}}$  and  $\text{Fe}^{\text{III}}$  for 23, 27, and 33 °C in the two pool model.

### Corner plot for Three pool model

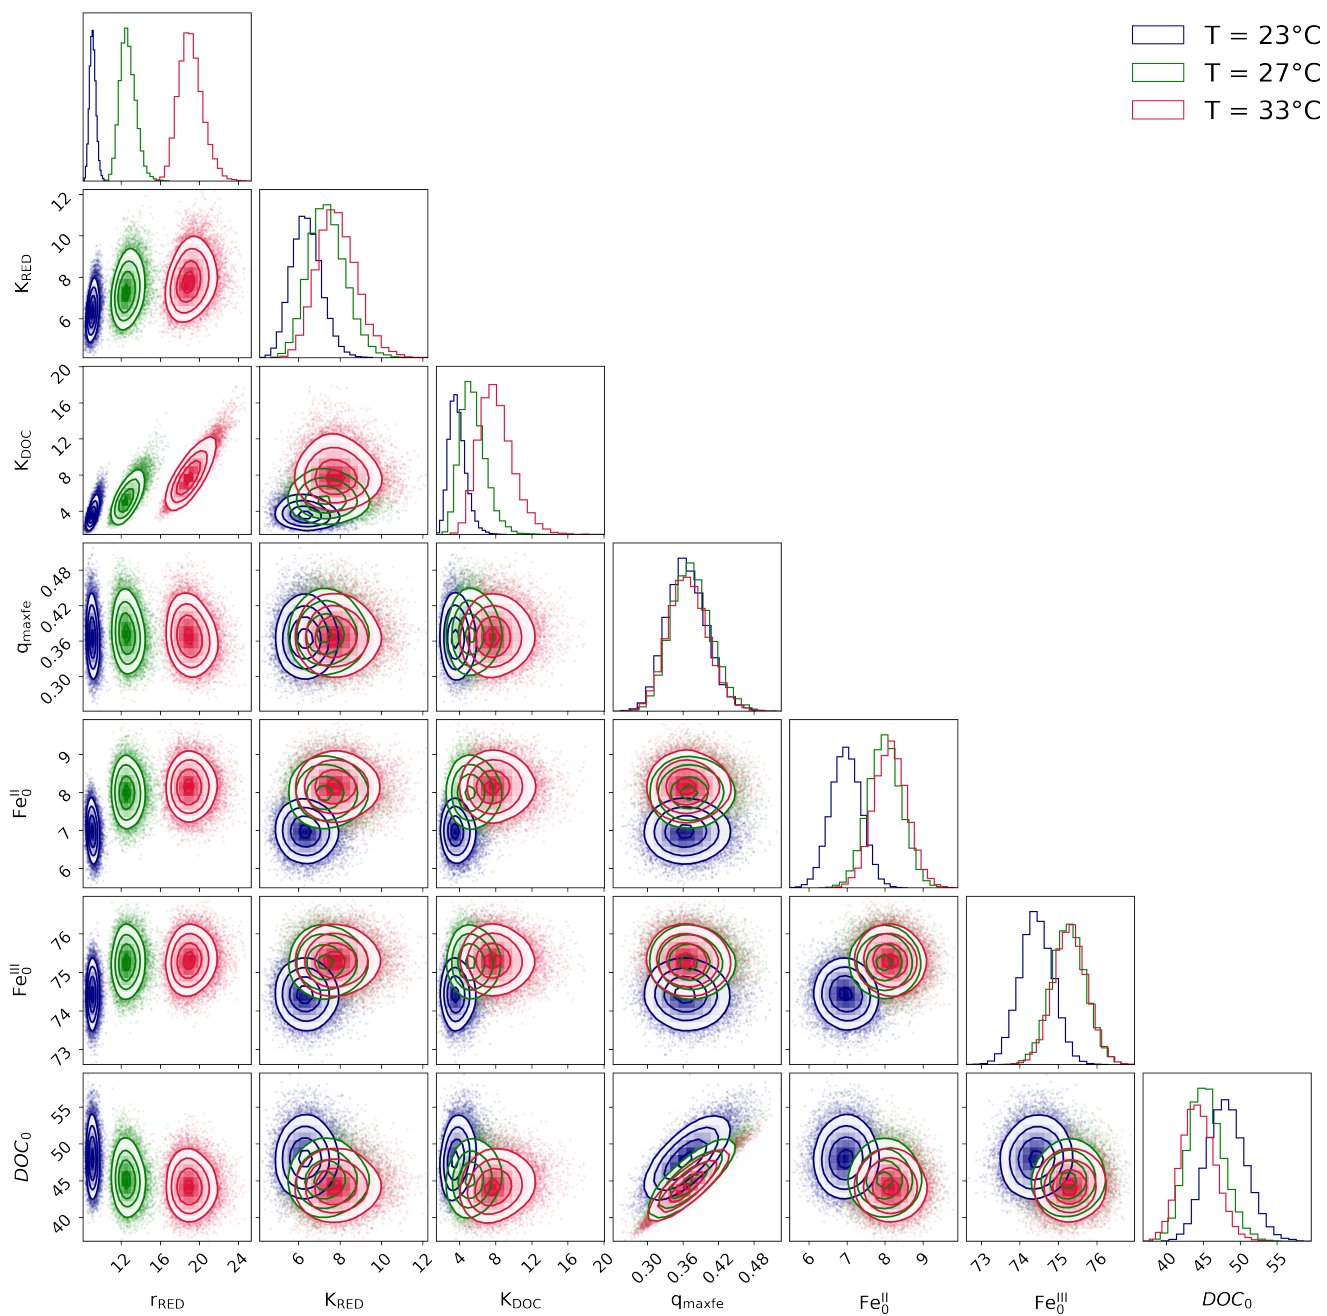

**Figure S4.** Posterior distributions of parameters ( $\Gamma_{\text{RED}}$ ,  $K_{\text{RED}}$ ,  $K_{\text{DOC}}$ ,  $q_{\text{maxfe}}$ ) and initial values of  $\text{Fe}^{\text{II}}$ ,  $\text{Fe}^{\text{III}}$ , and  $\text{DOC}$  for 23, 27, and  $33^\circ\text{C}$  in the three pool model.
